# Supplementary material
Source: PubMed Central journal article supplement (PMC4600668)
Supplement: NIHMS716233-supplement-4.pdf [file NIHMS716233-supplement-4.pdf]

Supplemental Table S1. List of primers used in this study.

| S.No | Human Gene | Forward primer sequence (5'-3') | Revers primer sequence (5'-3') |
|------|------------|---------------------------------|--------------------------------|
| 1    | PPIG       | GAAGAGTGCATCAAGAACCCATGAC       | GTCTCTCCTCCTTCTCCTCCTATCTTT    |
| 2    | Albumin    | TGCTGAAACATTACCTTCCATGC         | TTCACGAGCTCAACAAGTGCAG         |
| 3    | AFP        | ACCCGAACCTTCCAAGCCATAAC         | TCCAGCACATCTCCTCTGCAAC         |
| 4    | OAS1       | TGTGTGTCCAAGGTGGTAAAGGG         | AAGACAACCAGGTCAGCGTCAG         |
| 5    | ISG15      | TCCTGCTGGTGGTGGACAAATG          | TGCGGCCCTTGTTATTCCTCAC         |
| 6    | MX1        | GCAAAATCAAGGCACTGGAAGAGC        | TGAAAGCAAGCCGGACCATATCC        |
| 7    | HSH2D      | TCCATGGTGCAATCTCAAGAGAGG        | AAAGGATCCCAGTGGCTGTGAC         |
| 8    | SAMHD1     | CAGAAAGAGTTTGTATGCCGCAAG        | GGGCTATAACATCGCCATCCTG         |
| 9    | ZNFX1      | TCTCGCTGGCAGCTTTATAGGC          | AGCTCGGCCATTCTTTCTGCTG         |
| 10   | OGFR       | TGGCTGTTTCTCTGCGAGAAC           | TAAACACCTCGACCTCCCTGAGC        |
| 11   | APOL2      | AGGAAGCTGGAACGAGGGTTAAG         | TTCTTGGAGCTCTCCAGTCAC          |
| 12   | ETV7       | GACGCCAAGATCTTCCGAGTTG          | AGGTCATGTTACCCGGTTCTTG         |
| 13   | GBP1       | ACAGAAGTGCTAGAAGCCAGTGC         | TCCAGGCTGTTCCCTTGTCTGTTC       |
| 14   | PSMB9      | TCGAGAGGACTTGTCTGCACATC         | TCCAGGGTTCCATATACCTGACC        |
| 15   | TRANK1     | AAGCACCAAGTGCTGGAAGGTTG         | GGGCCAACTTCTCCTTCTCAAATG       |
| 16   | RBM43      | TGGCCTTTGTGTATTCAGTGCTTG        | AGCTCATTTTCGTGGGTGCTCTG        |
| 17   | TMEM140    | TCTCTGCACCTCCTTTCTGTCC          | TCAGGCAGATGACCACAATCACG        |
| 18   | CNP        | CAAGAAGGAGCTGCGACAATTCCG        | AGGTGACCAAGTCCATCTTCTCC        |
| 19   | CLMP       | AGAATTCAGGGCGCTACGTGTG          | TGGGCTTGGATGGTCTCACTAAG        |
| 20   | PPM1J      | TTCTCCAGACCGACCTTTCTGC          | ACTCTTGCCAGCATTGATGACCTC       |
| 21   | PLEKHA4    | TACTTGCCGACTTCCGAAGGTCAC        | TGGGAGTCCAAATTTCCACCTGTC       |
| 22   | RASGRP3    | GCCTCTCACCACTTAGAACCCAAC        | TGTGATAGAGGTCCAGGGAAAGCG       |
| 23   | LAMP3      | CAACCGATGTCCAACCTTCAAGCC        | AGACGAGCACTCATCCACATTTCC       |
| 24   | GAPDH1     | CCACCTTTGACGCTGGG               | CATACCAGGAAATGAGCTTGACA        |
| 25   | APOL6      | AAAGGAGAGCTCCGTGGAGAGAAG        | AGGAGCGTCATCCTCATCCCTTTG       |
| 26   | HCV        | CTGGGTCCTTTCTTGGATAA            | CCTATCAGGCAGTACCACA            |
